# Supplementary material for: Lipomatous Tumors: A Comparison of MRI-Reported Diagnosis with Histological Diagnosis
Source: MDPI journal article supplement (doi:10.3390/diagnostics12051281), 2022-05-21
Supplement: s1 [file s1]

| histologic entity   | frequent false diagnosis in MRI | n  | total in cohort | false in % | total false per entity in % |
|---------------------|---------------------------------|----|-----------------|------------|-----------------------------|
| lipoma              | soft tissue sarcoma             | 3  | 116             | 2.6        | 34.5                        |
| lipoma              | LPS                             | 21 | 116             | 18.1       |                             |
| lipoma              | malignancy cannot be excluded   | 4  | 116             | 3.5        |                             |
| lipoma              | ALT                             | 11 | 116             | 9.5        |                             |
| lipoma              | lymphoma                        | 1  | 116             | 0.9        |                             |
|                     |                                 |    |                 |            |                             |
| fibro lipoma        | LPS                             | 1  | 4               | 25.0       | 50,00                       |
| fibro lipoma        | malignancy cannot be excluded   | 1  | 4               | 25.0       |                             |
|                     |                                 |    |                 |            |                             |
| spindle cell lipoma | LPS                             | 1  | 3               | 33.3       | 66.7                        |
| spindle cell lipoma | malignancy cannot be excluded   | 1  | 3               | 33.3       |                             |
|                     |                                 |    |                 |            |                             |
| angio lipoma        | LPS                             | 1  | 6               | 16.7       | 16.7                        |
|                     |                                 |    |                 |            |                             |
| hibernoma           | malignancy cannot be excluded   | 2  | 3               | 66.7       | 66.7                        |
|                     |                                 |    |                 |            |                             |
| ALT                 | LPS                             | 4  | 39              | 10.3       | 12.8                        |
| ALT                 | rhabdomyosarcoma                | 1  | 39              | 2.6        |                             |

**Supplementary Data: Entities of over-diagnosed tumours in MRI.** Altogether, 52 lipomatous tumours were wrongly categorized as more malignant in MRI than in histologic assessment.
